# Supplementary material for: Berberine Decreases Intestinal GLUT2 Translocation and Reduces Intestinal Glucose Absorption in Mice
Source: MDPI journal article supplement (doi:10.3390/ijms23010327), 2021-12-28
Supplement: s1 [file s1]

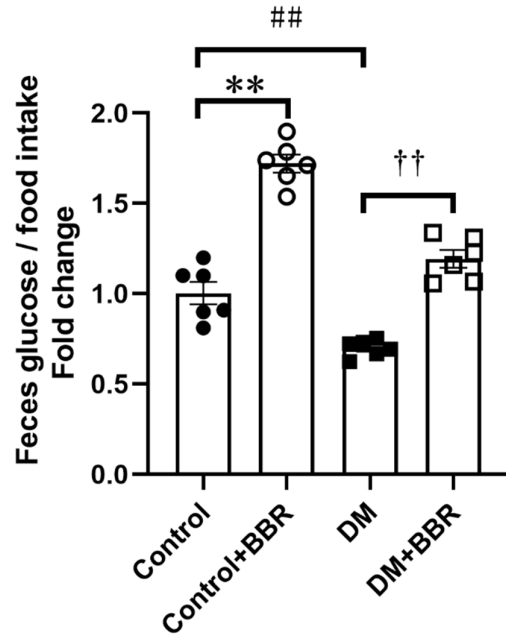

**Figure S1.** Berberine treatment (200 mg•kg<sup>-1</sup>•day<sup>-1</sup>, BW) for 6 weeks decreased feces glucose in diabetic mice. Data are expressed as mean ± SEM (n=6). Control, control mice; Control + BBR, control mice treated with berberine (200 mg•kg<sup>-1</sup>•day<sup>-1</sup> gavage), DM, diabetic mice; DM + BBR, diabetic mice treated with berberine (200 mg•kg<sup>-1</sup>•day<sup>-1</sup> gavage). Control vs. Control + BBR, \*  $p < 0.05$ , \*\*  $p < 0.01$ ; Control vs. DM, #  $p < 0.05$ , ##  $p < 0.01$ ; DM vs. DM + BBR, †  $p < 0.05$ , ††  $p < 0.01$ .

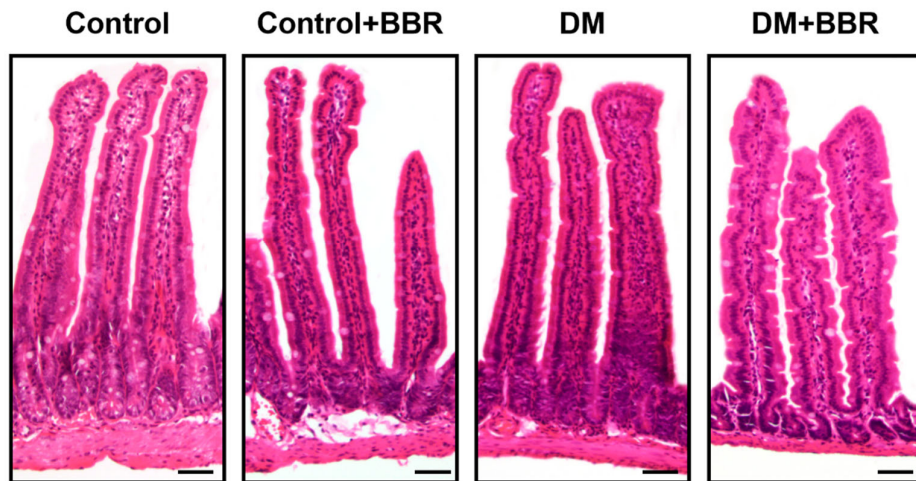

**Figure S2.** Berberine treatment (200 mg•kg<sup>-1</sup>•day<sup>-1</sup>, BW) for 6 weeks decreased intestinal crypt depth but not villus length in diabetic mice. Representative H&E staining of small intestine of each group. Control, control mice; Control + BBR, control mice treated with berberine (200 mg•kg<sup>-1</sup>•day<sup>-1</sup> gavage), DM, diabetic mice; DM + BBR, diabetic mice treated with berberine (200 mg•kg<sup>-1</sup>•day<sup>-1</sup> gavage). Scale bar: 100 μm.

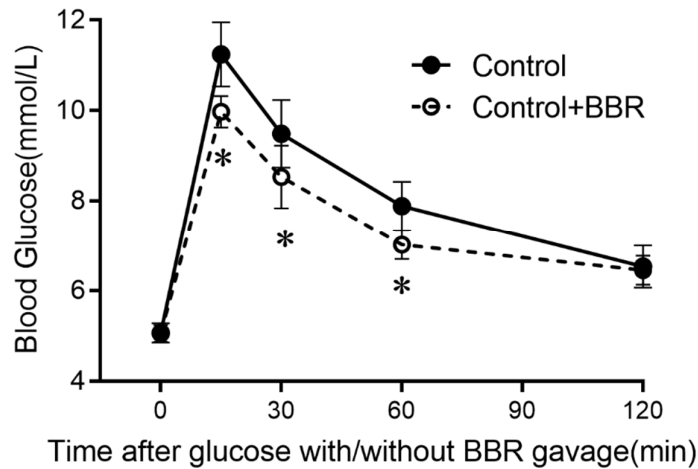

**Figure S3. A single dose gavage of berberine (200 mg•kg<sup>-1</sup>, BW) decreased postprandial blood glucose in normal mice.** Data are expressed as mean ± SEM (n=6). Control, normal mice garaged by glucose; Control + BBR, control mice treated with a single dose gavage of berberine (200 mg•kg<sup>-1</sup>, BW) +glucose, Control vs. Control + BBR, \*  $p < 0.05$

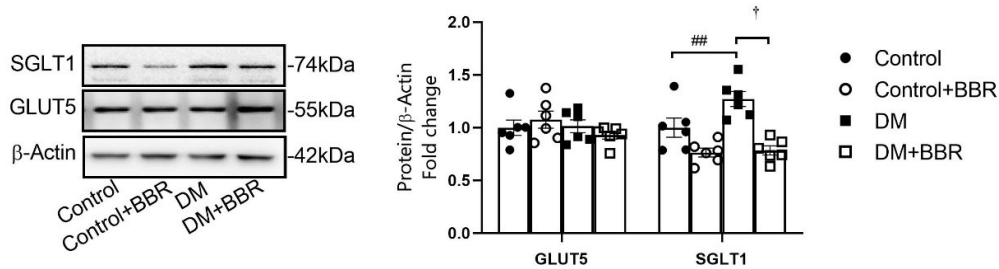

**Figure S4. Berberine treatment (200 mg•kg<sup>-1</sup>•day<sup>-1</sup>, BW) for 6 weeks decreased intestinal SGLT1 expression, but not GLUT5, in diabetic mice.** Data are expressed as mean ± SEM (n=6). Control, control mice; Control + BBR, control mice treated with berberine (200 mg•kg<sup>-1</sup>•day<sup>-1</sup> gavage), DM, diabetic mice; DM + BBR, diabetic mice treated with berberine (200 mg•kg<sup>-1</sup>•day<sup>-1</sup> gavage). Control vs. DM, #  $p < 0.05$ , ##  $p < 0.01$ ; DM vs. DM + BBR, †  $p < 0.05$ , ††  $p < 0.01$ .
